# Supplementary material for: Exploring substitution effects on the potential dominant conformations of NBF derivatives leading to functional conversion at the mu opioid receptor
Source: Royal Society of Chemistry journal article supplement (doi:10.1039/d5cb00036j), 2025-01-01
Supplement: d5cb00036j1.pdf [file d5cb00036j1.pdf]

## Exploring substitution effects on the potential dominant conformations of NBF derivatives leading to functional conversion at the mu opioid receptor

Ennian Li<sup>a</sup>, Ahmed Reda<sup>a</sup>, Hongguang Ma, Samuel Woodard<sup>b</sup>, James C. Gillespie<sup>b</sup>, Dana E. Selley<sup>b</sup>, William L. Dewey<sup>b</sup>, Piyusha P. Pagare<sup>a</sup>, Yan Zhang<sup>a,b,c,d</sup>

### Table of Contents

Figure S1. Root mean square deviation (RMSD) of backbone atoms of the protein during the MD simulation.

Figure S2. 3D structures of chair conformation of compounds 2,3,4 and boat conformation of compounds 8,9,10 at the C6.

Figure S3-S42. <sup>1</sup>H NMR, <sup>13</sup>C NMR, HRMS, and HPLC spectrum for compounds **2-6** and **8-12**.

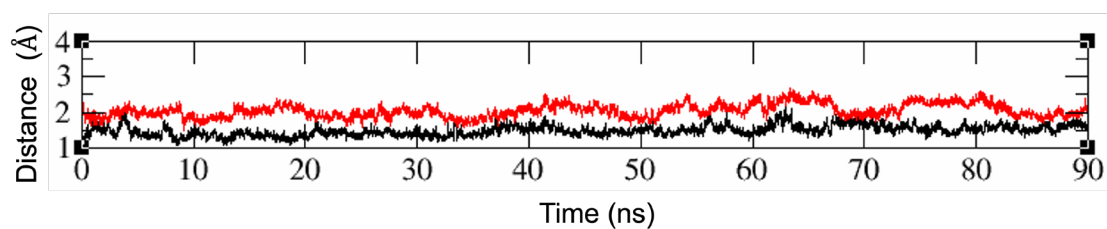

Figure S1. Root Mean Square Deviations (RMSD) of backbone atoms of the protein during the MD simulation; red represents Compound **3** bound to the inactive MOR, and black represents Compound **9** bound to the active MOR.

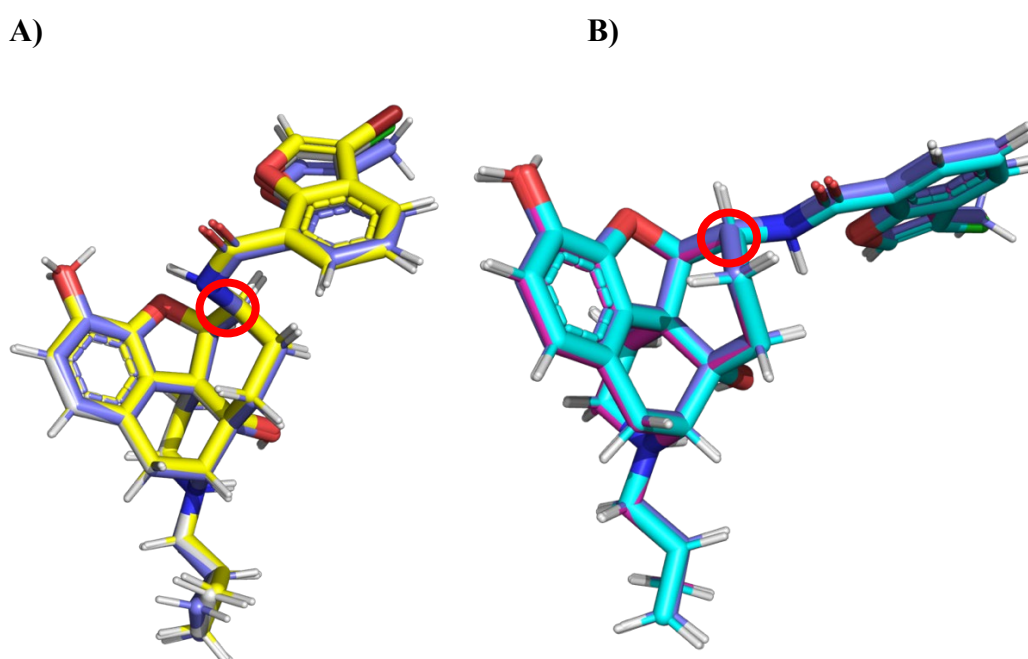

Figure S2. 3D structures of chair conformation of compounds 2,3,4 and boat conformation of compounds 8,9,10 at the C6. A) compounds 2,3,4 showing the chair conformation of C6 B) compounds 8,9,10 after docking showing the boat conformation at the C6. Carbon atoms: **2**, **8**, (Magenta); **3**, **9**, (cyan); **4**, **10** (blue); oxygen atoms (red); nitrogen atoms (blue).

Compound **2**

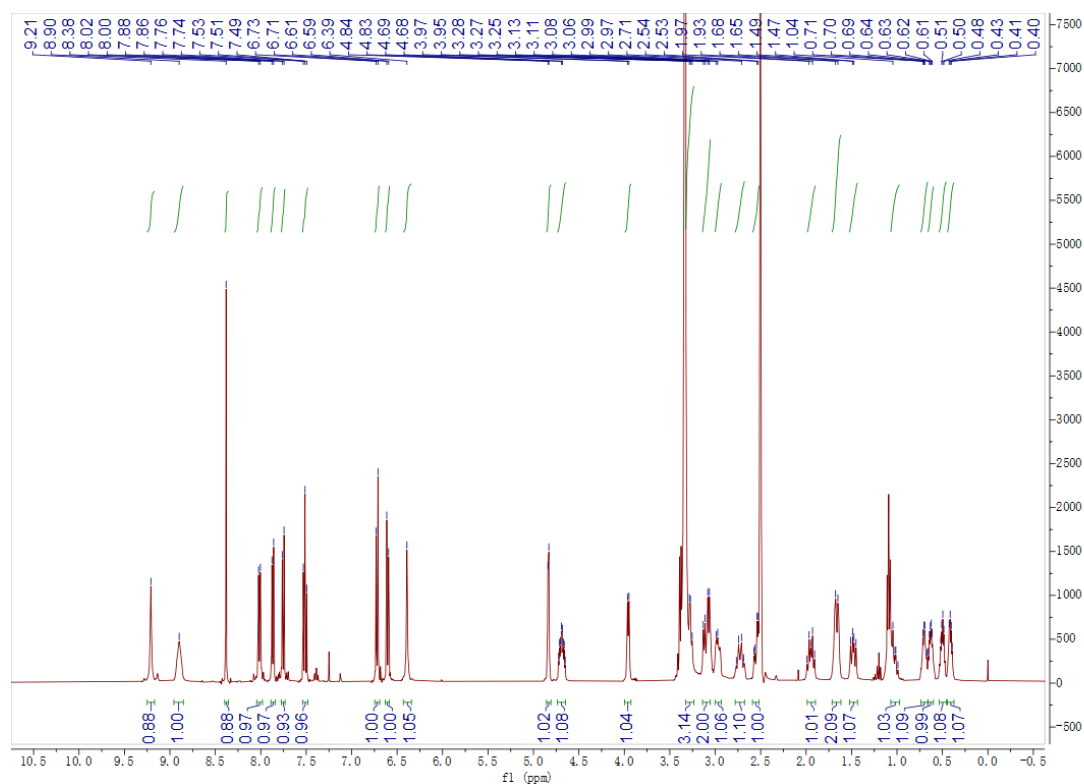

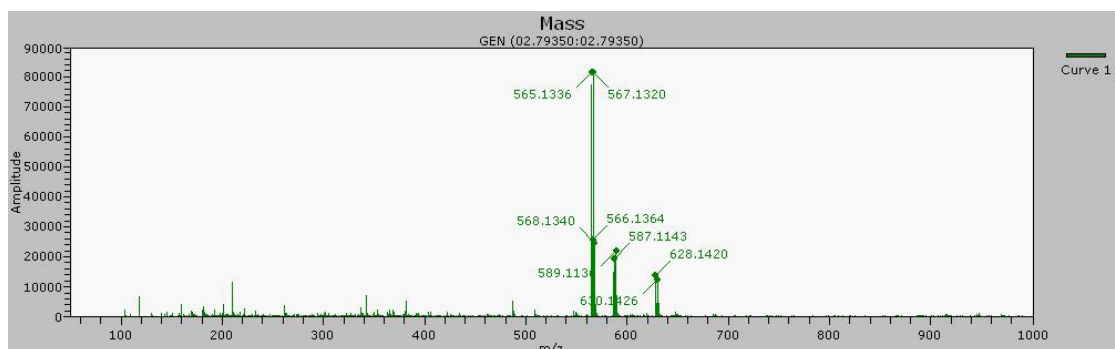

Figure S5. HRMS

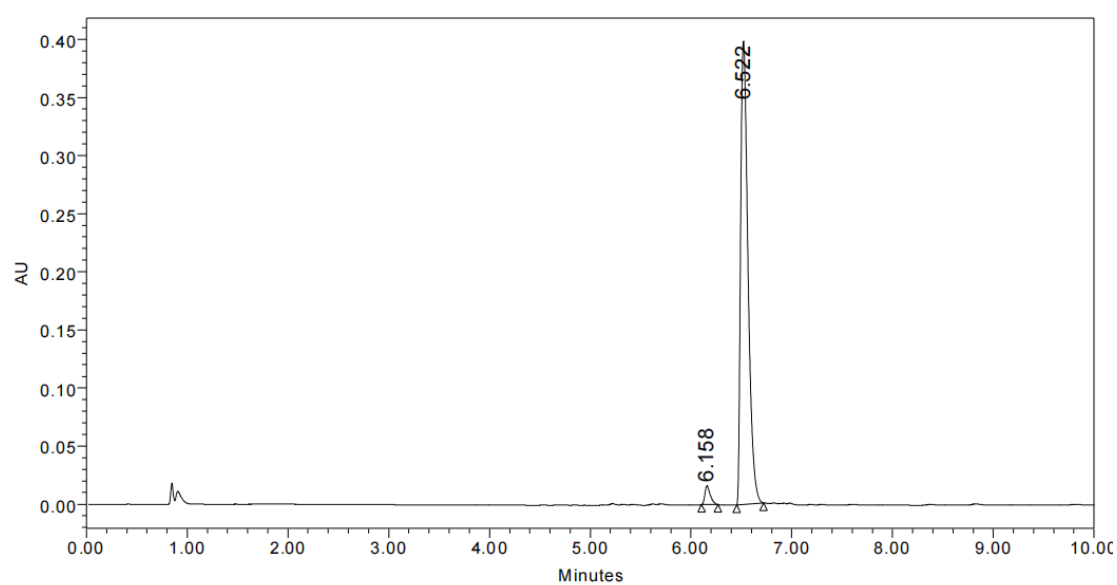

|   | RT    | Area    | % Area | Height |
|---|-------|---------|--------|--------|
| 1 | 6.158 | 60094   | 2.90   | 16157  |
| 2 | 6.522 | 2014323 | 97.10  | 398472 |

Figure S6. HPLC

Compound **3**

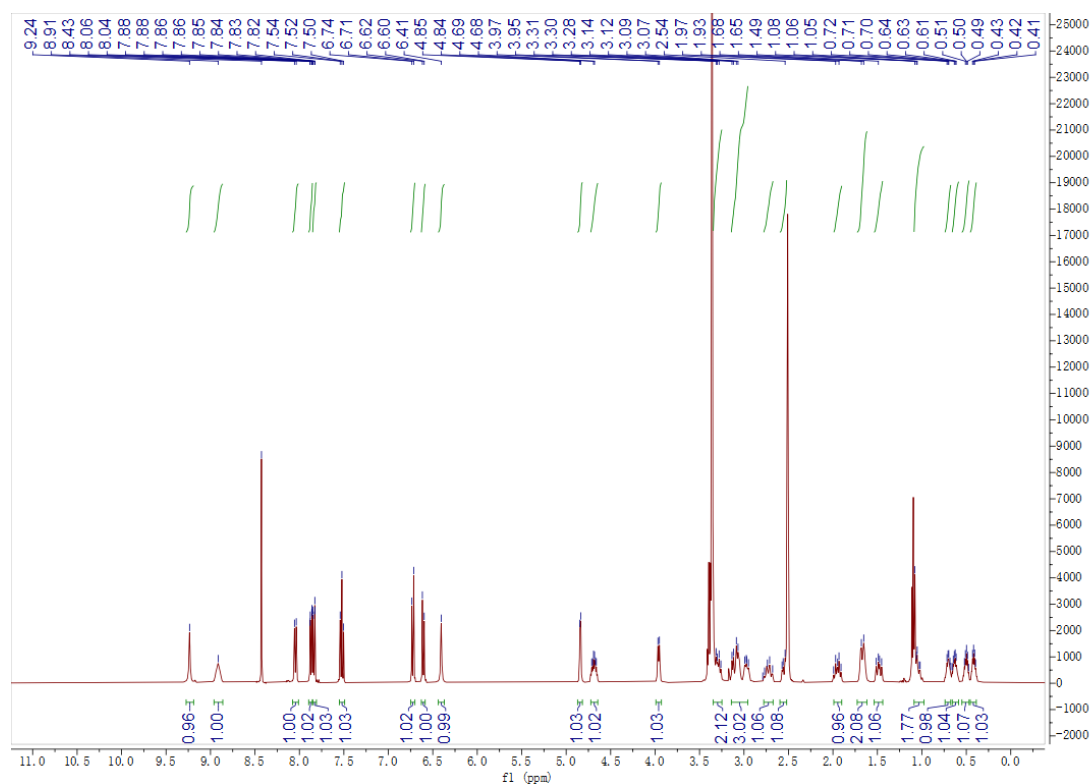

Figure S7. <sup>1</sup>H NMR (400M HZ, DMSO-*d*<sub>6</sub>)

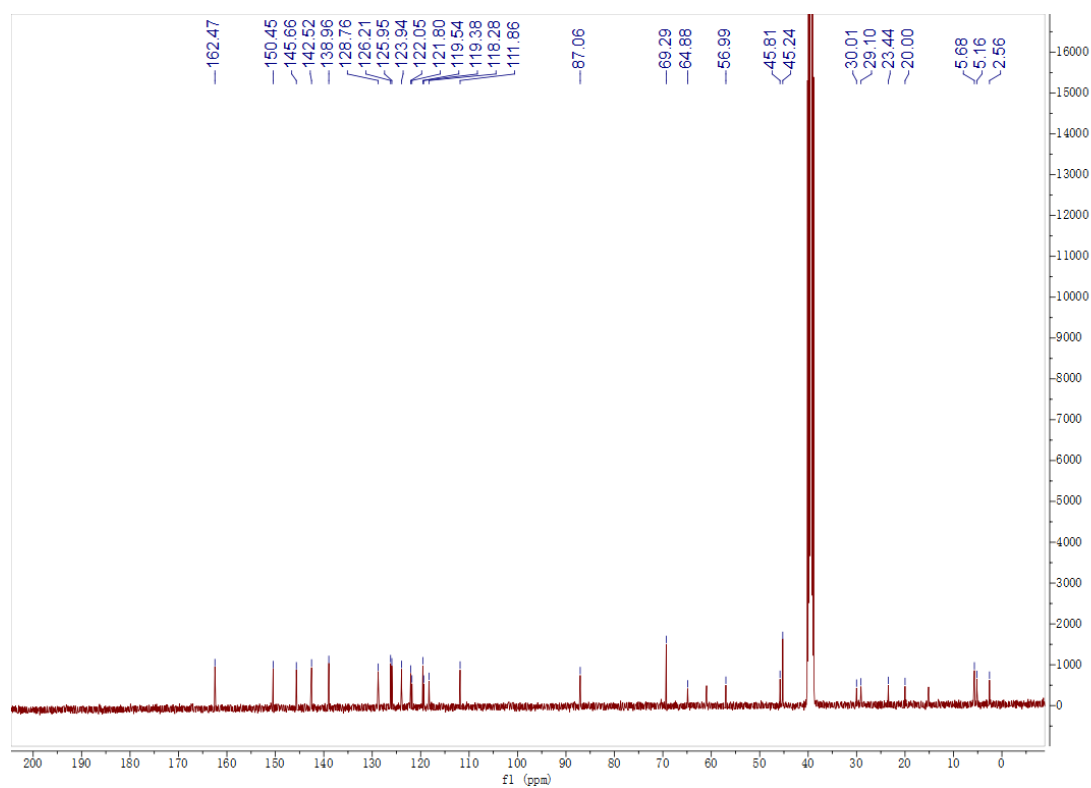

Figure S8. <sup>13</sup>C NMR (100M HZ, DMSO-*d*<sub>6</sub>)

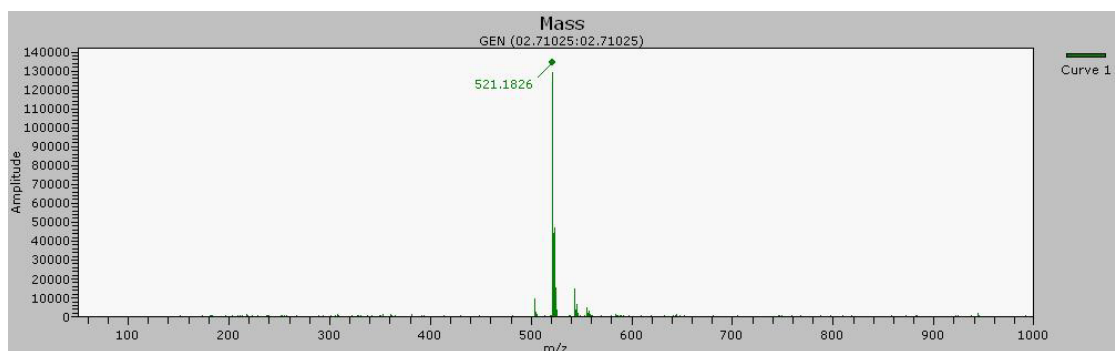

Figure S9. HRMS

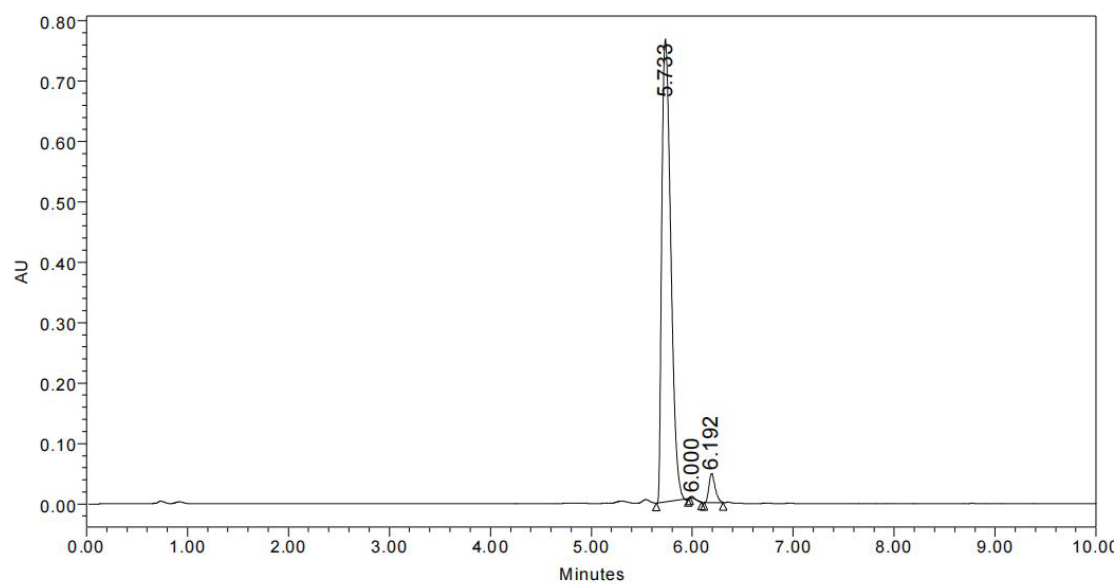

|   | RT    | Area    | % Area | Height |
|---|-------|---------|--------|--------|
| 1 | 5.733 | 4721477 | 95.65  | 765719 |
| 2 | 6.000 | 8826    | 0.18   | 3176   |
| 3 | 6.192 | 206088  | 4.17   | 48273  |

Figure S10. HPLC

Compound 4

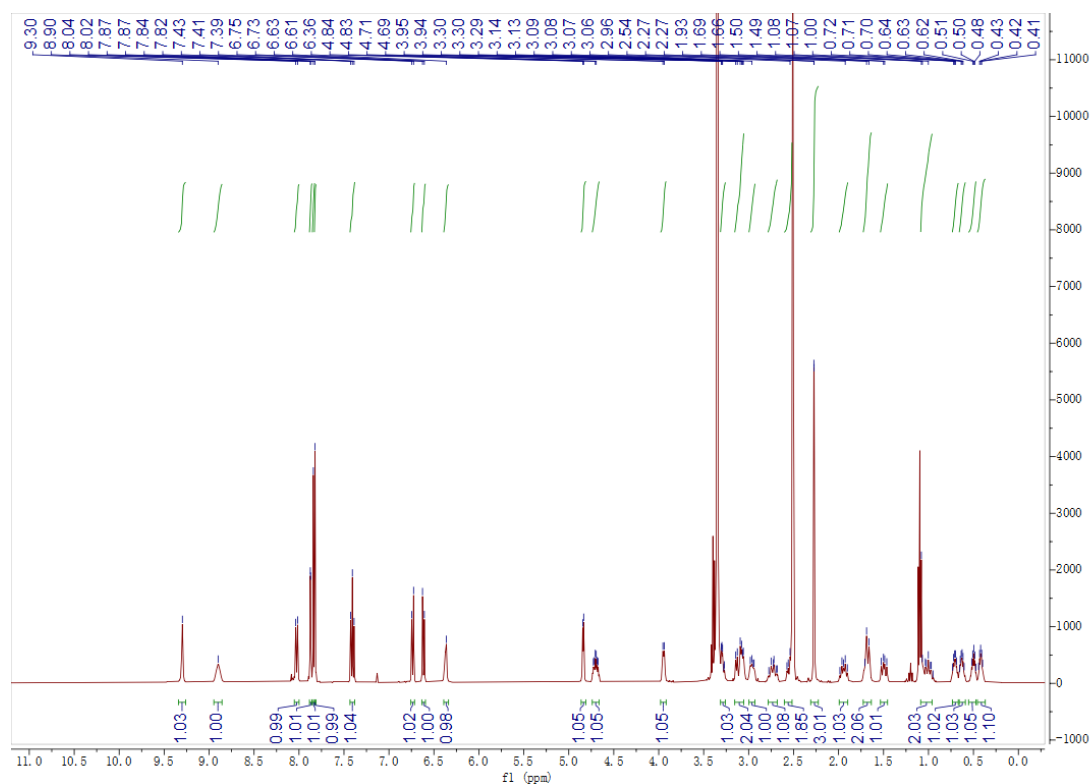

Figure S11. <sup>1</sup>H NMR (400M HZ, DMSO-*d*<sub>6</sub>)

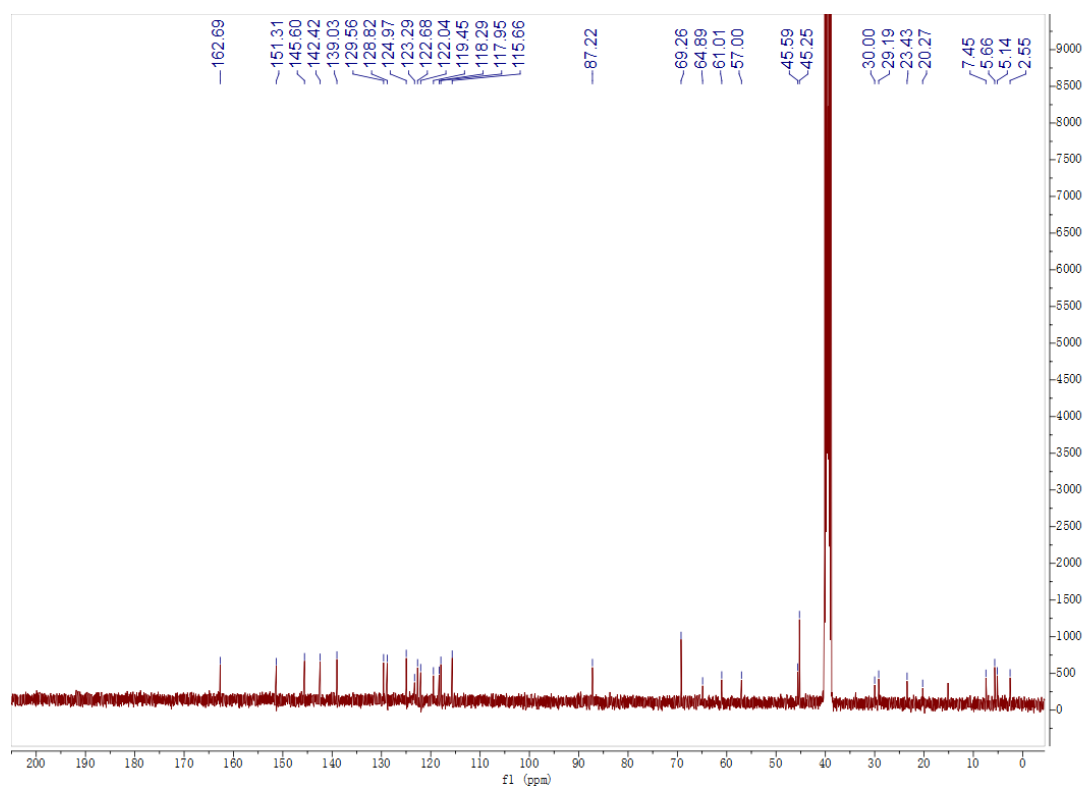

Figure S12. <sup>13</sup>C NMR (100M HZ, DMSO-*d*<sub>6</sub>)

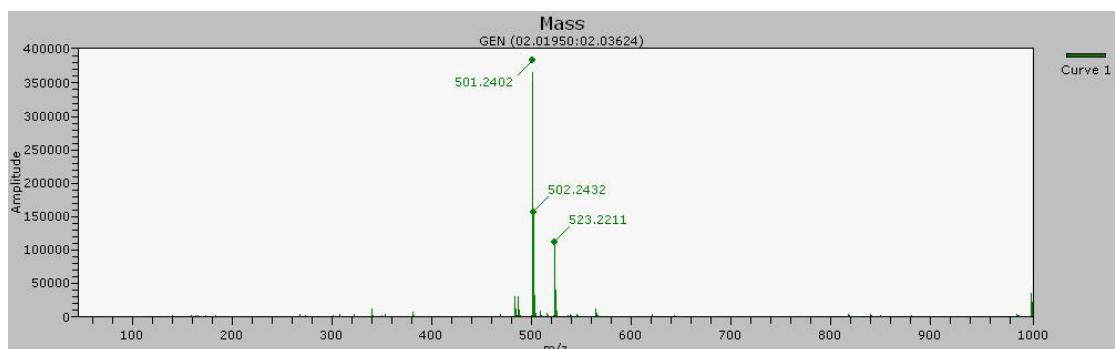

Figure S13. HRMS

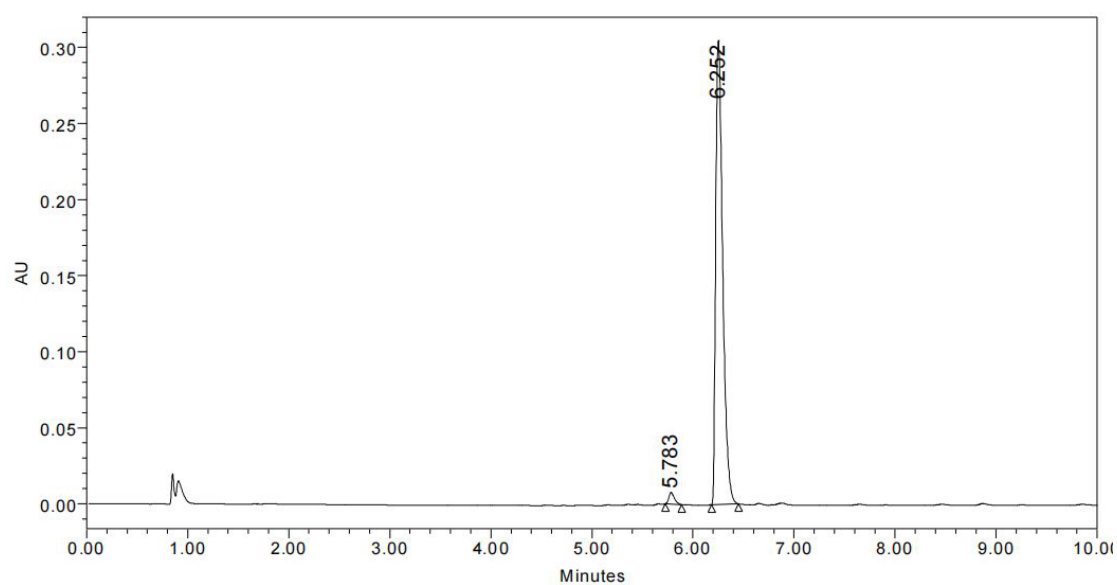

|   | RT    | Area    | % Area | Height |
|---|-------|---------|--------|--------|
| 1 | 5.783 | 28744   | 1.92   | 7634   |
| 2 | 6.252 | 1469221 | 98.08  | 304936 |

Figure S14. HPLC



Compound **5**

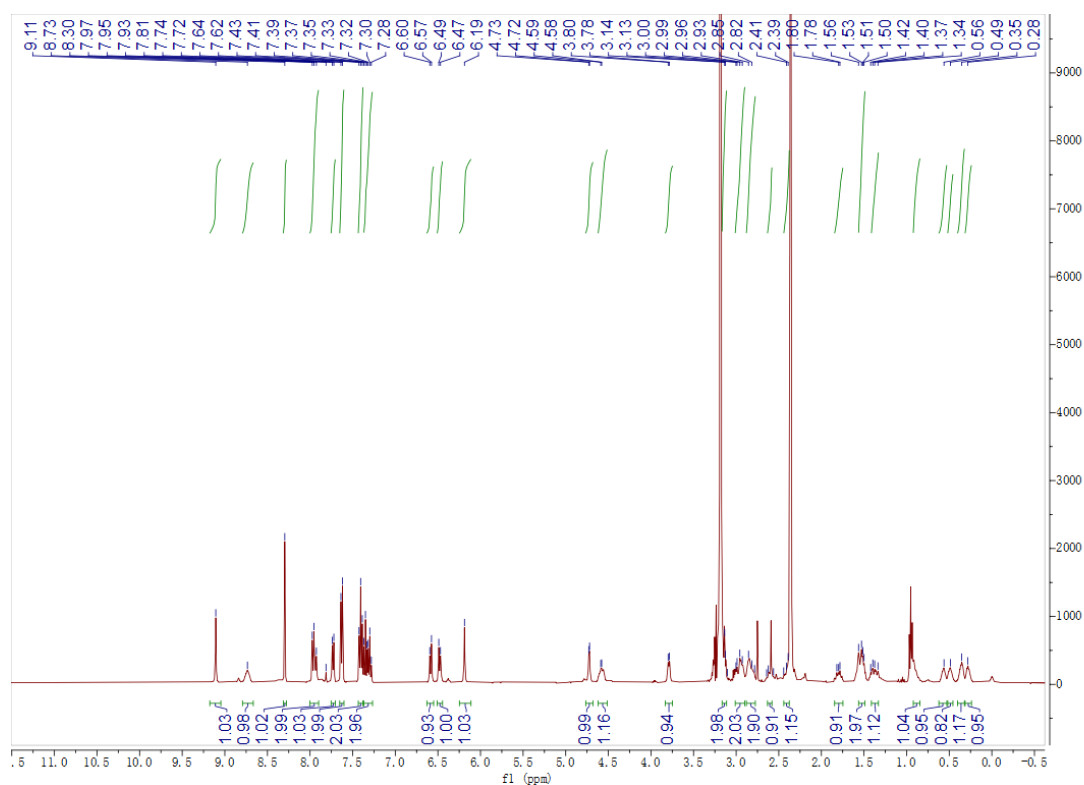

Figure S15. <sup>1</sup>H NMR (400M HZ, DMSO-*d*<sub>6</sub>)

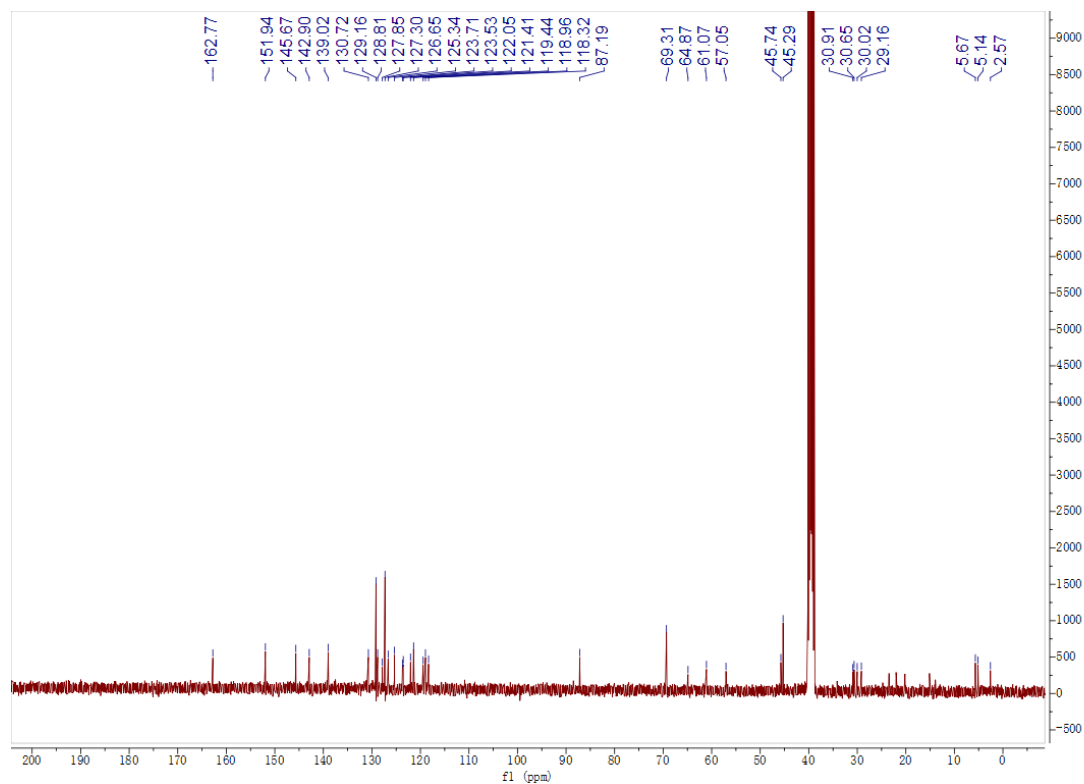

Figure S16. <sup>13</sup>C NMR (100M HZ, DMSO-*d*<sub>6</sub>)

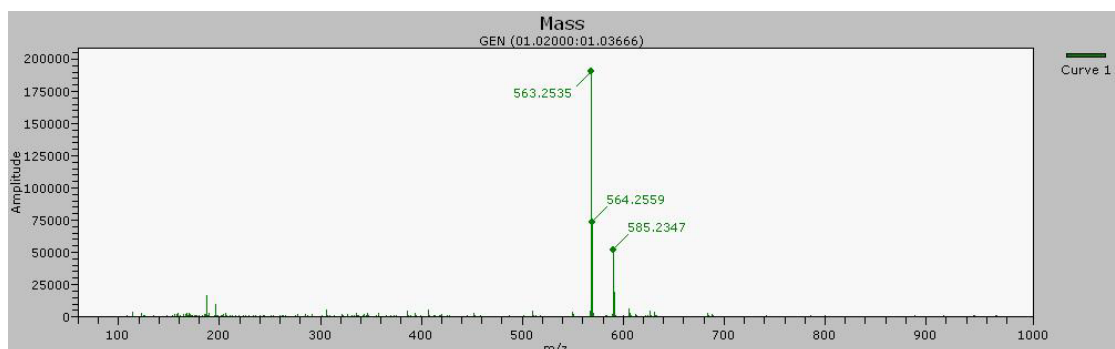

Figure S17. HRMS

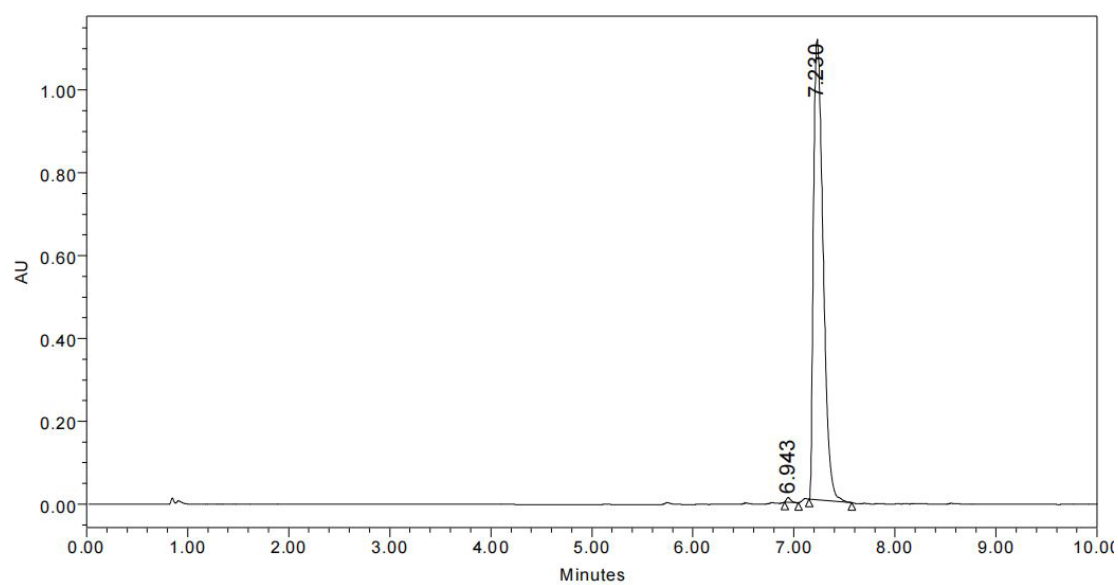

|   | RT    | Area    | % Area | Height  |
|---|-------|---------|--------|---------|
| 1 | 6.943 | 34262   | 0.46   | 11432   |
| 2 | 7.230 | 7365314 | 99.54  | 1111619 |

Figure S18. HPLC

# Compound 6

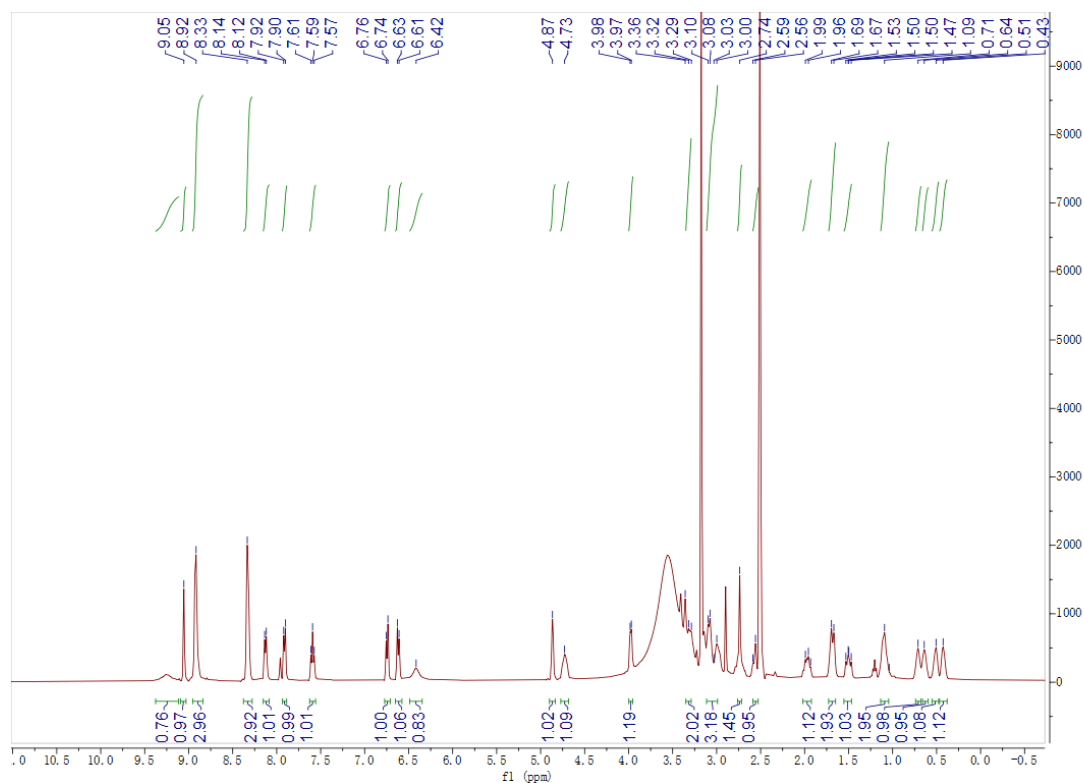

Figure S19. <sup>1</sup>H NMR (400M HZ, DMSO-*d*<sub>6</sub>)

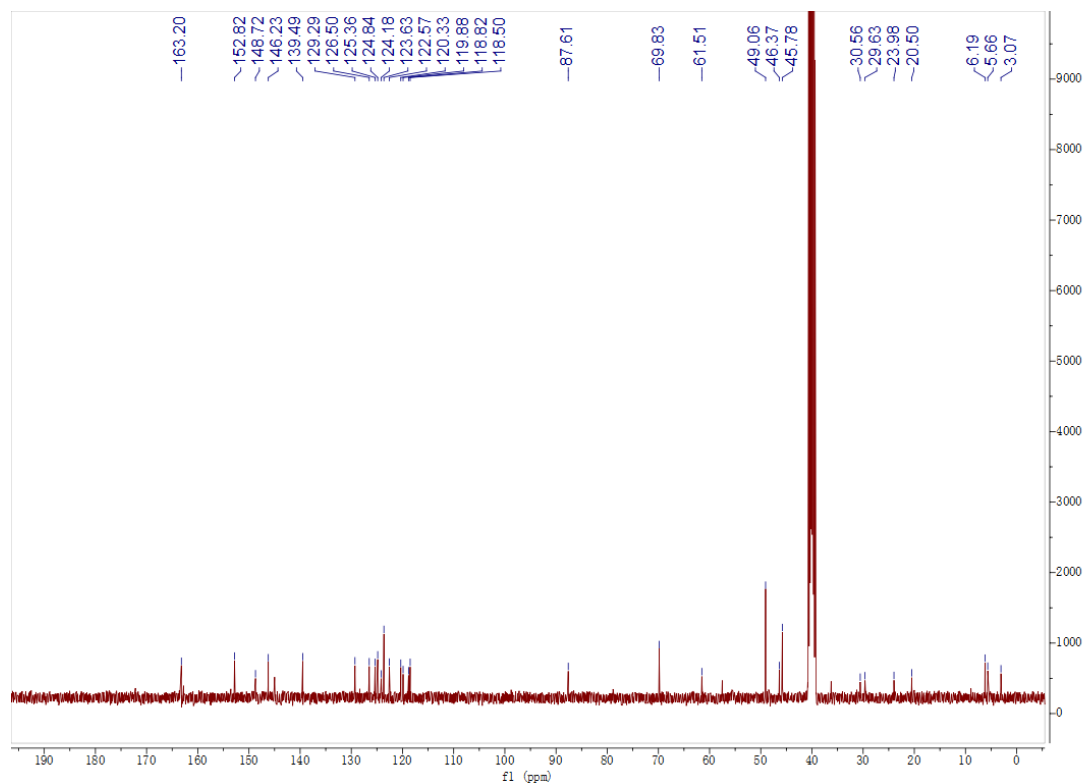

Figure S20. <sup>13</sup>C NMR (100M HZ, DMSO-*d*<sub>6</sub>)

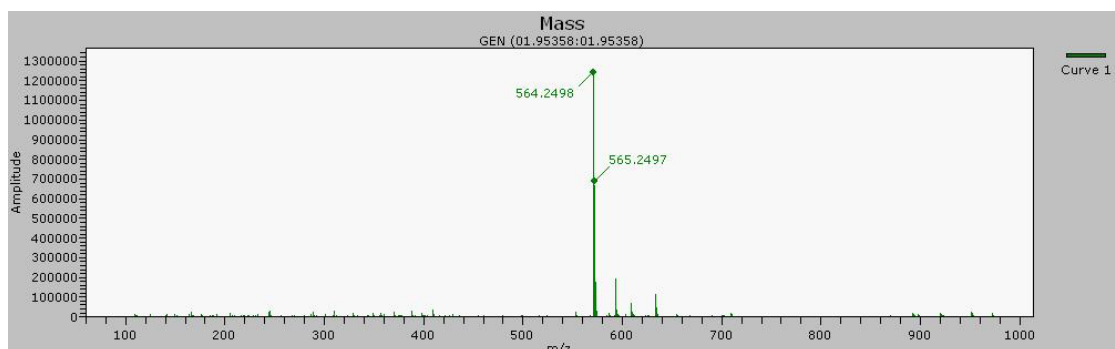

Figure S21. HRMS

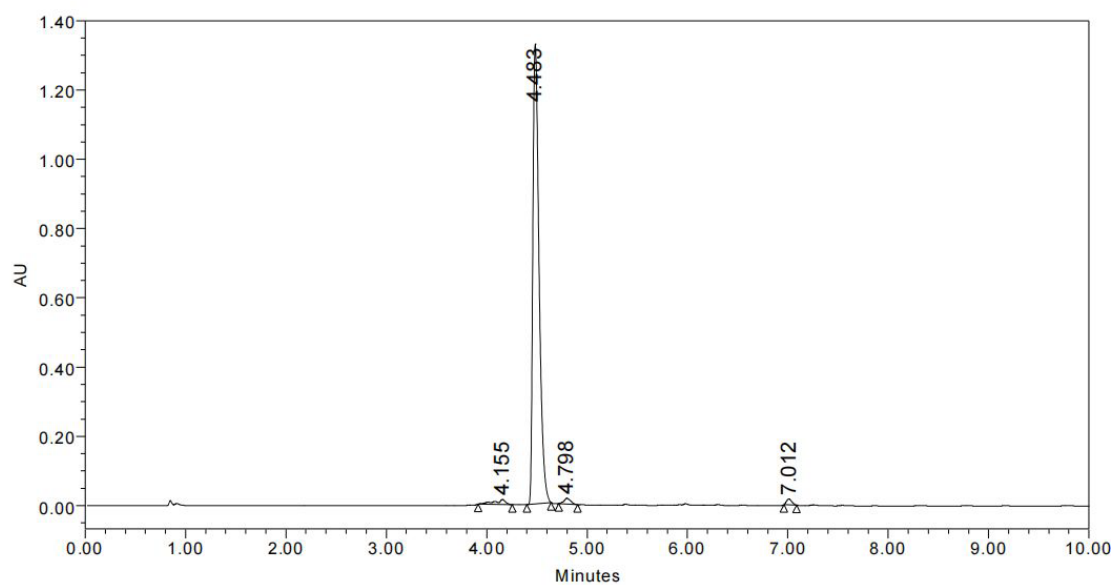

|   | RT    | Area    | % Area | Height  |
|---|-------|---------|--------|---------|
| 1 | 4.155 | 112582  | 1.90   | 14765   |
| 2 | 4.483 | 5672182 | 95.62  | 1327658 |
| 3 | 4.798 | 83626   | 1.41   | 17408   |
| 4 | 7.012 | 63386   | 1.07   | 17135   |

Figure S22. HPLC

# Compound 8

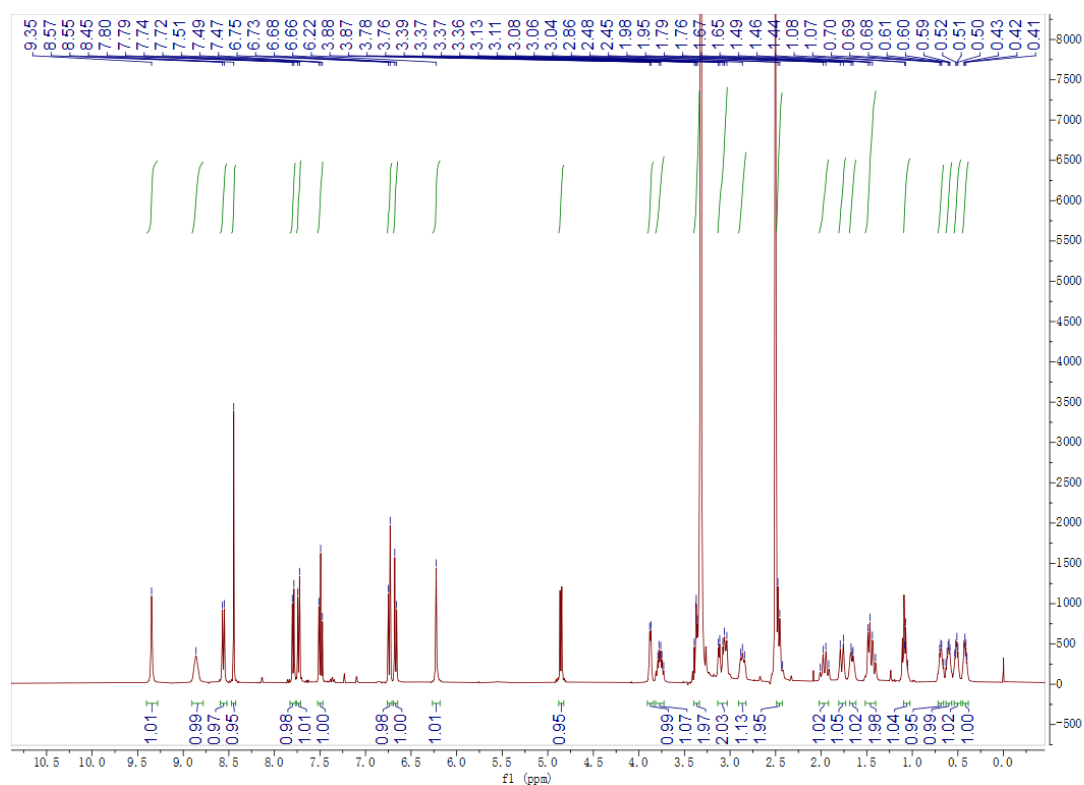

Figure S23. <sup>1</sup>H NMR (400M HZ, DMSO-*d*<sub>6</sub>)

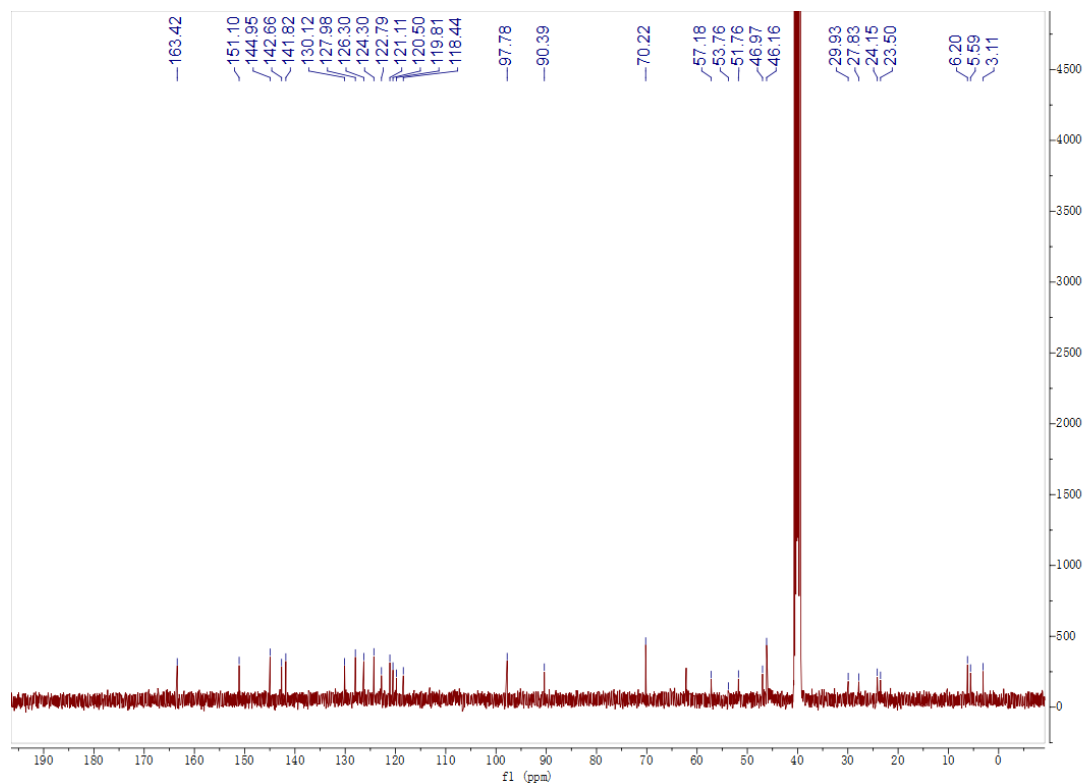

Figure S24. <sup>13</sup>C NMR (100M HZ, DMSO-*d*<sub>6</sub>)

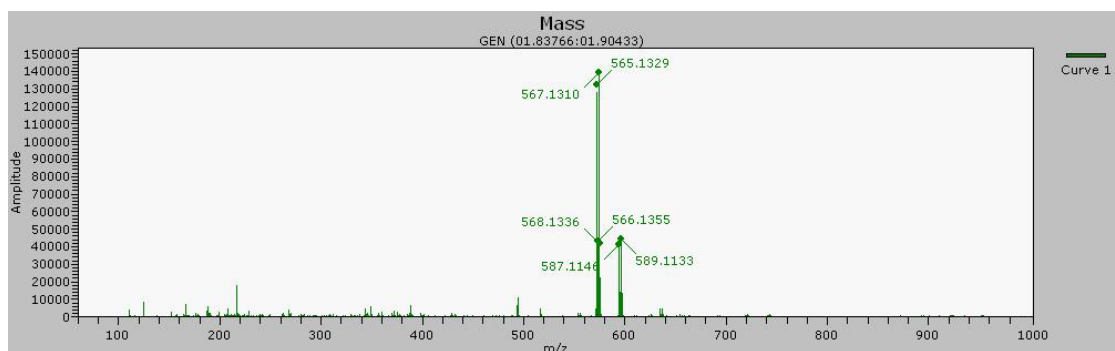

Figure S25. HRMS

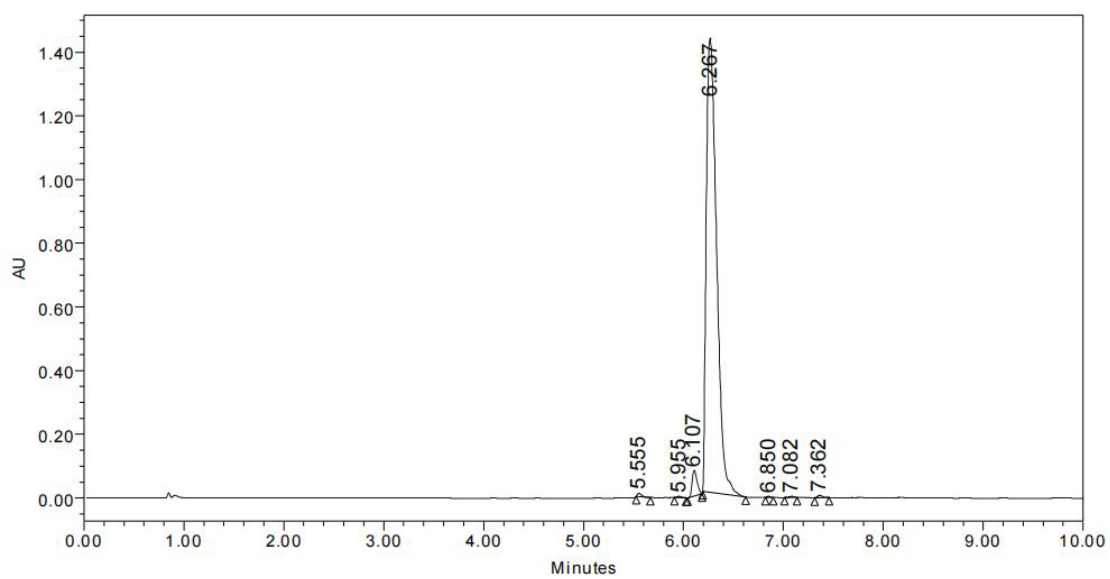

|   | RT    | Area     | % Area | Height  |
|---|-------|----------|--------|---------|
| 1 | 5.555 | 31573    | 0.30   | 10674   |
| 2 | 5.955 | 14341    | 0.14   | 4543    |
| 3 | 6.107 | 275753   | 2.60   | 80349   |
| 4 | 6.267 | 10224016 | 96.56  | 1426337 |
| 5 | 6.850 | 6668     | 0.06   | 2702    |
| 6 | 7.082 | 9959     | 0.09   | 3185    |
| 7 | 7.362 | 26177    | 0.25   | 7338    |

Figure S26. HPLC

# Compound 9

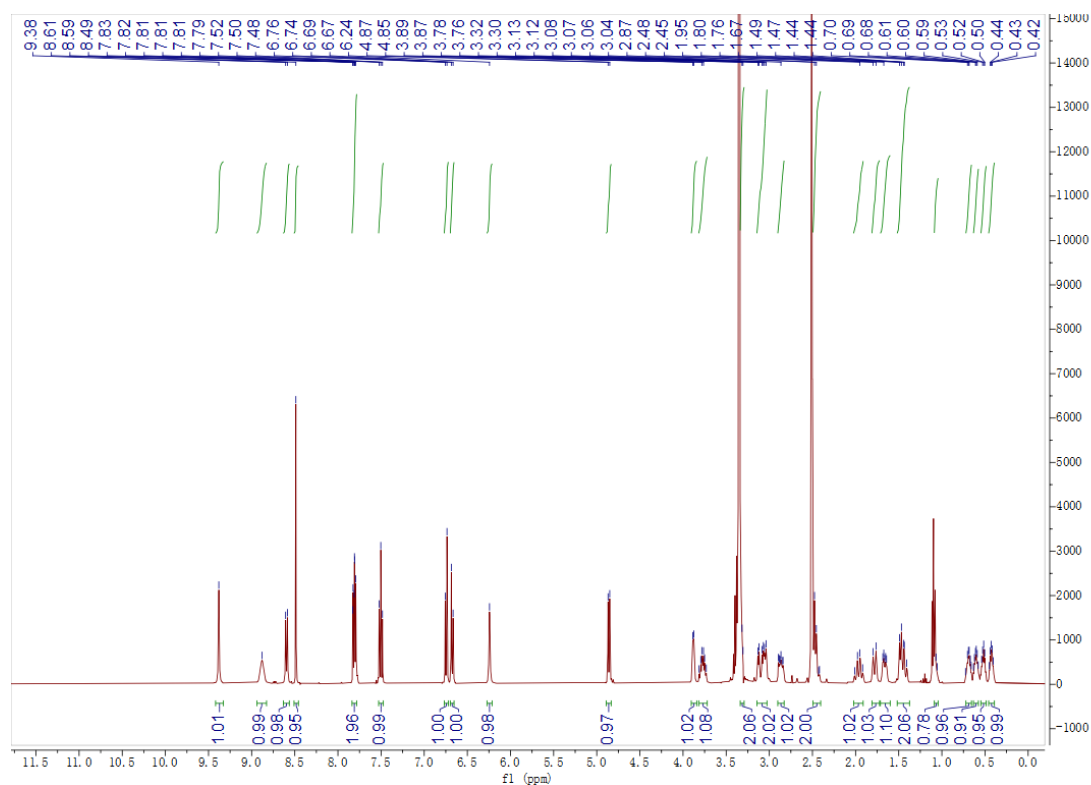

Figure S27. <sup>1</sup>H NMR (400M HZ, DMSO-*d*<sub>6</sub>)

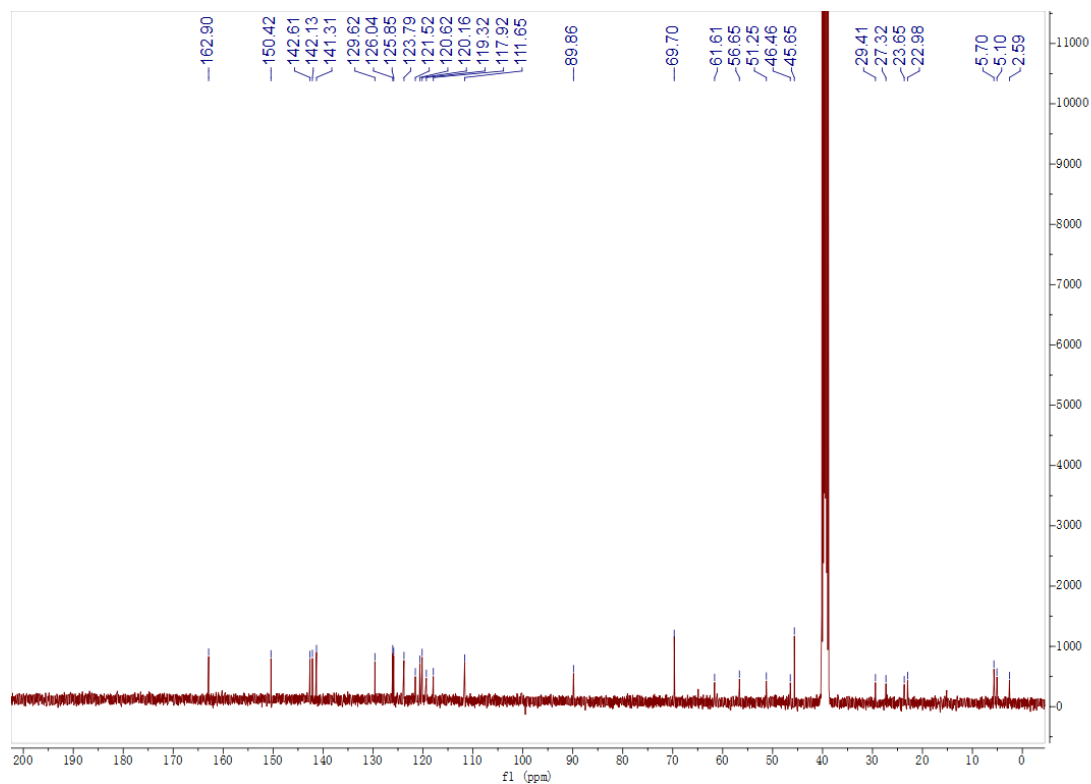

Figure S28. <sup>13</sup>C NMR (100M HZ, DMSO-*d*<sub>6</sub>)

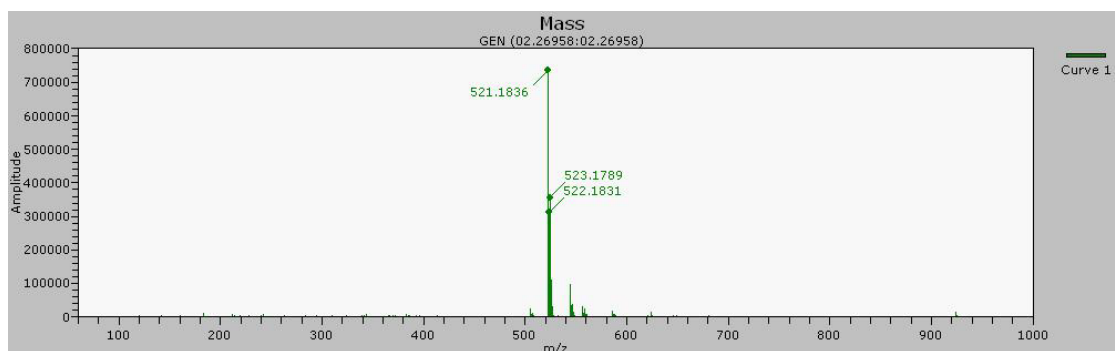

Figure S29. HRMS

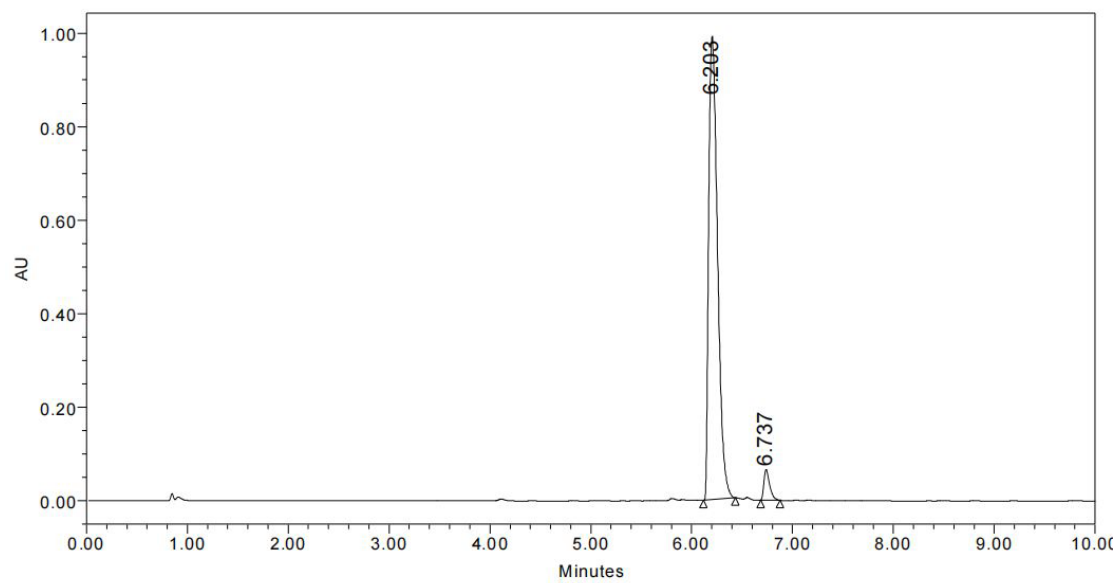

|   | RT    | Area    | % Area | Height |
|---|-------|---------|--------|--------|
| 1 | 6.203 | 6070714 | 95.95  | 991148 |
| 2 | 6.737 | 256524  | 4.05   | 65518  |

Figure S30. HPLC



# Compound 10

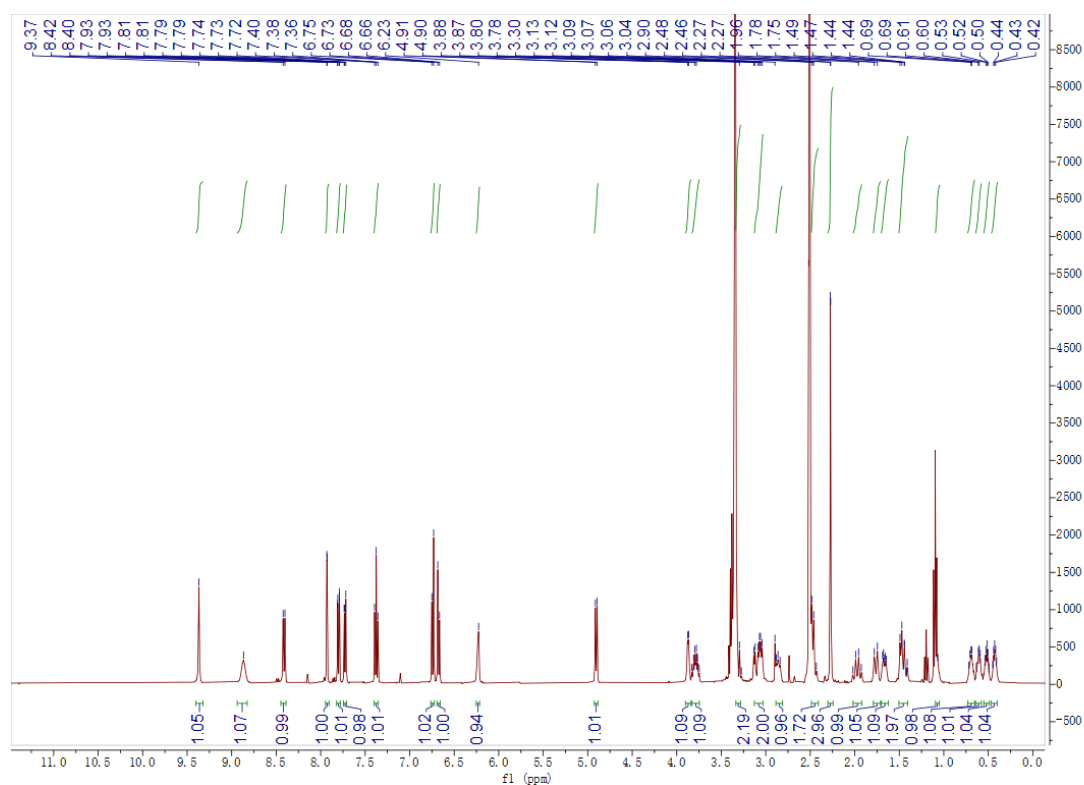

Figure S31. <sup>1</sup>H NMR (400M HZ, DMSO-*d*<sub>6</sub>)

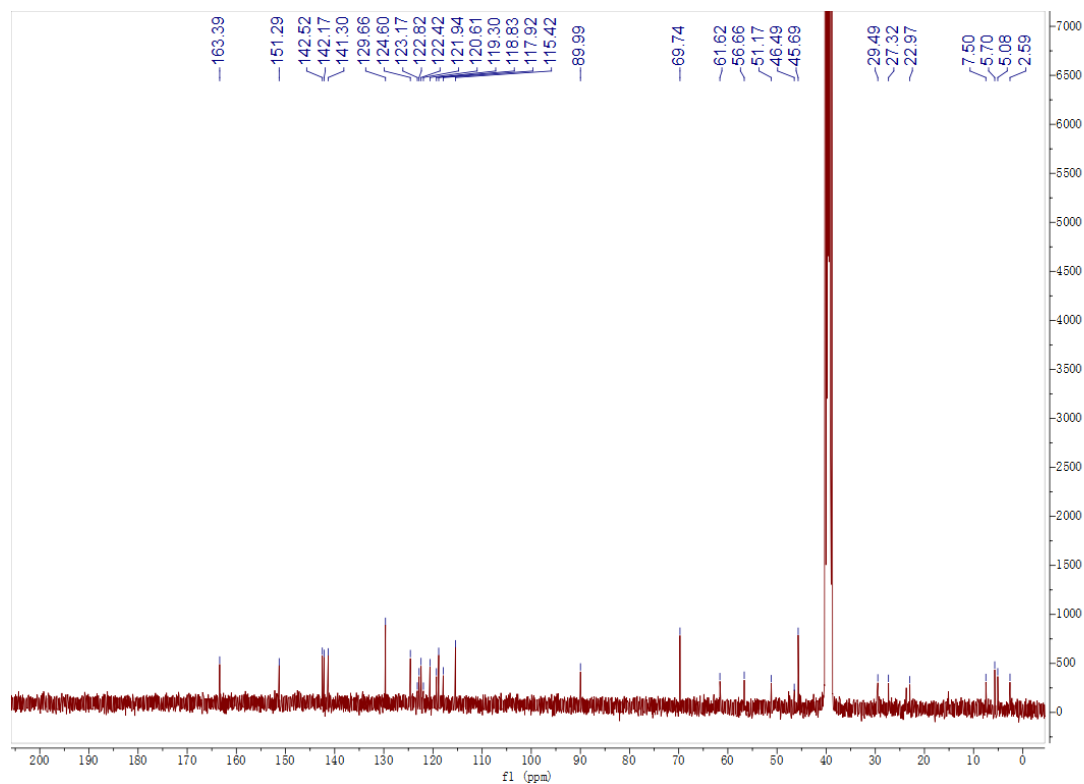

Figure S32. <sup>13</sup>C NMR (100M HZ, DMSO-*d*<sub>6</sub>)

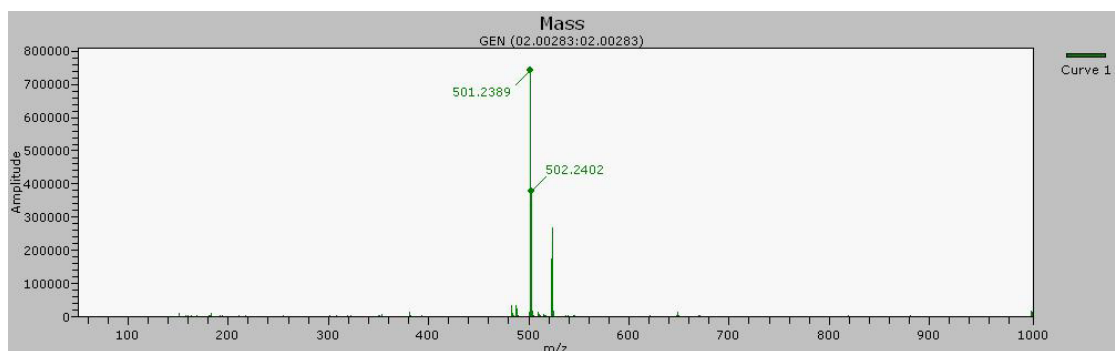

Figure S33. HRMS

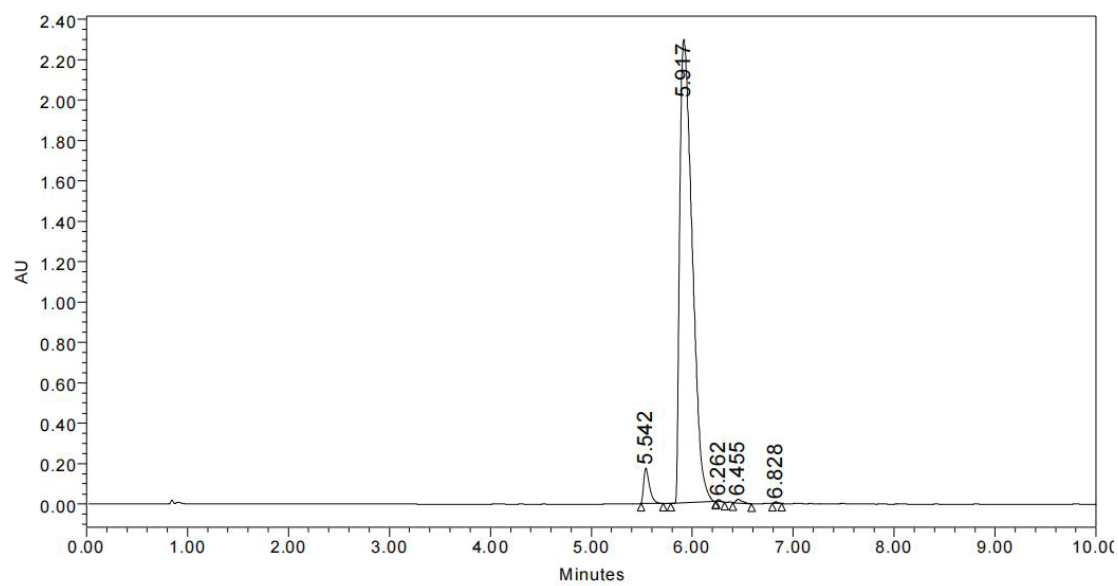

|   | RT    | Area     | % Area | Height  |
|---|-------|----------|--------|---------|
| 1 | 5.542 | 689199   | 3.35   | 172916  |
| 2 | 5.917 | 19796948 | 96.09  | 2292401 |
| 3 | 6.262 | 18062    | 0.09   | 7176    |
| 4 | 6.455 | 76934    | 0.37   | 18244   |
| 5 | 6.828 | 20685    | 0.10   | 7019    |

Figure S34. HPLC

# Compound 11

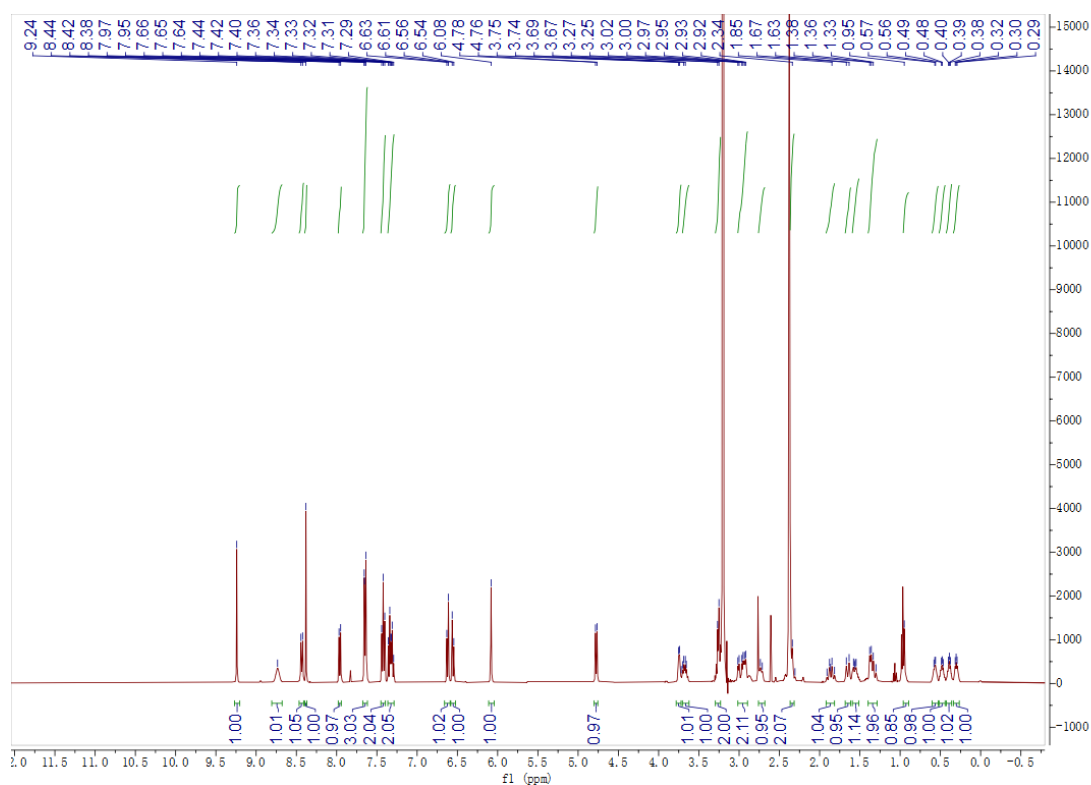

Figure S35. <sup>1</sup>H NMR (400M HZ, DMSO-*d*<sub>6</sub>)

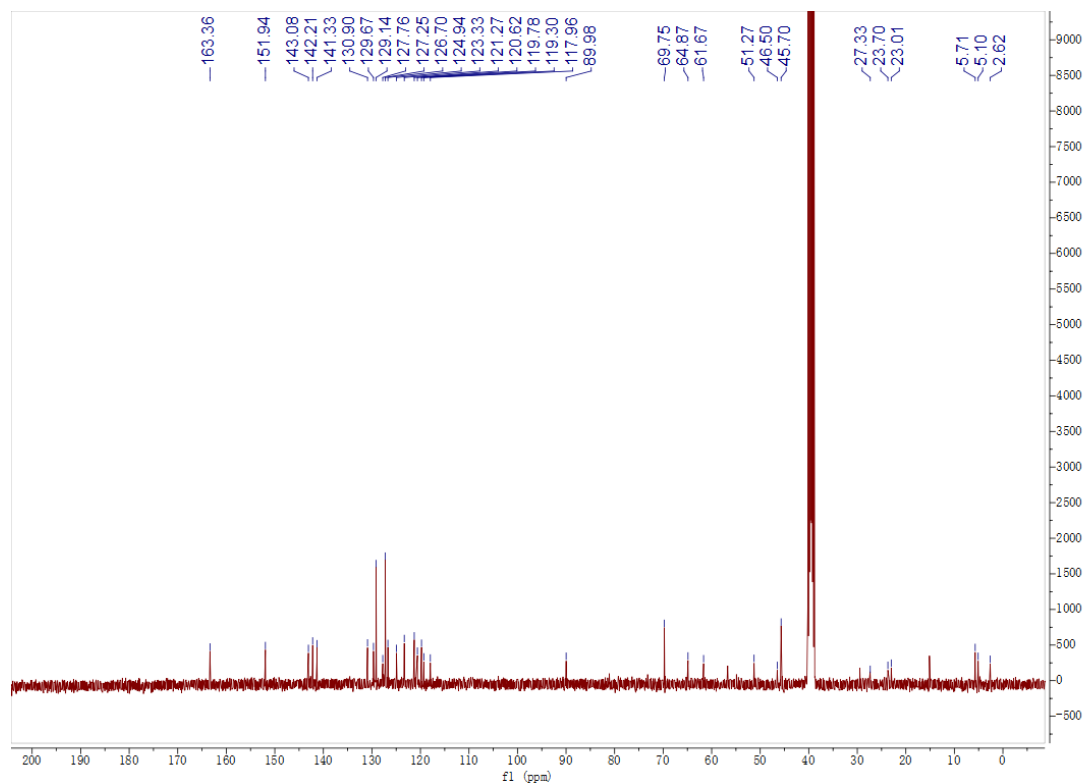

Figure S36. <sup>13</sup>C NMR (100M HZ, DMSO-*d*<sub>6</sub>)

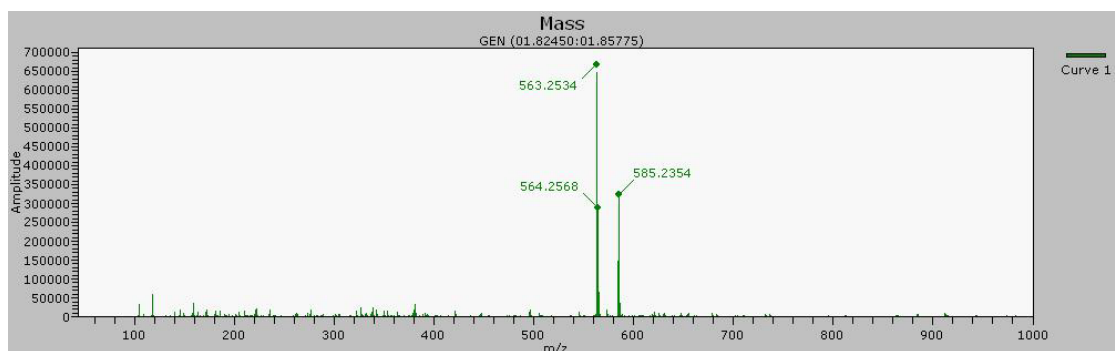

Figure S37. HRMS

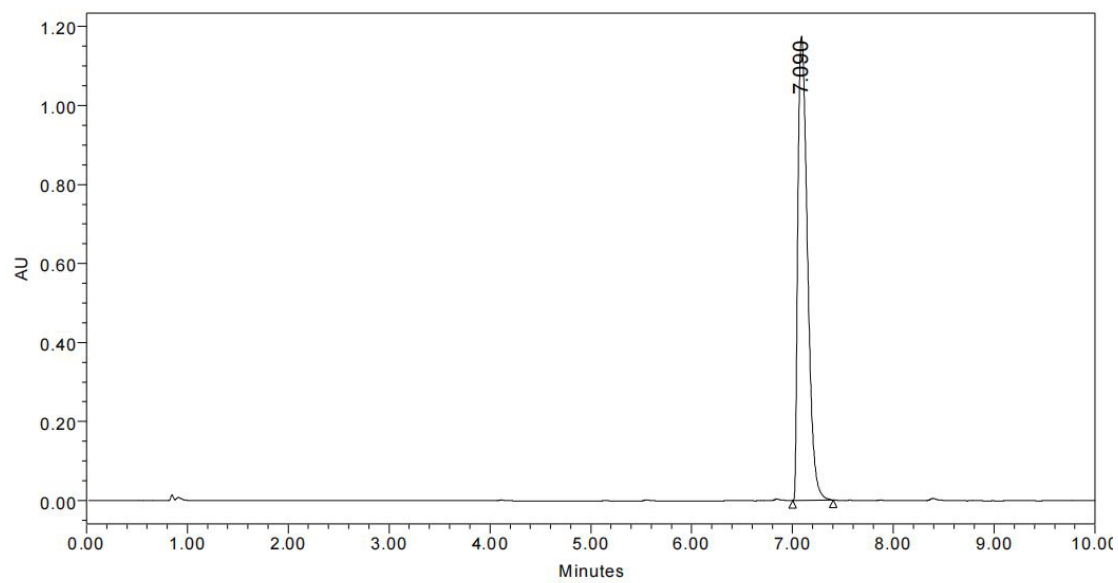

|   | RT    | Area    | % Area | Height  |
|---|-------|---------|--------|---------|
| 1 | 7.090 | 7788976 | 100.00 | 1174598 |

Figure S38. HPLC

# Compound 12

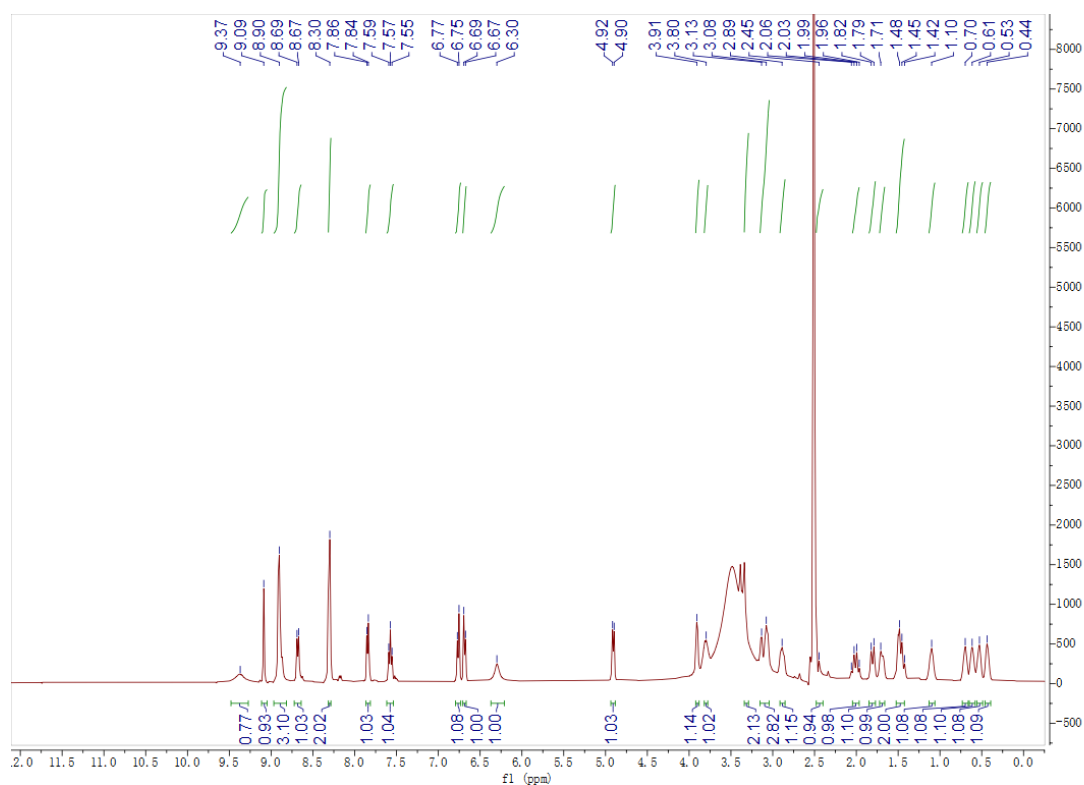

Figure S39. <sup>1</sup>H NMR (400M HZ, DMSO-*d*<sub>6</sub>)

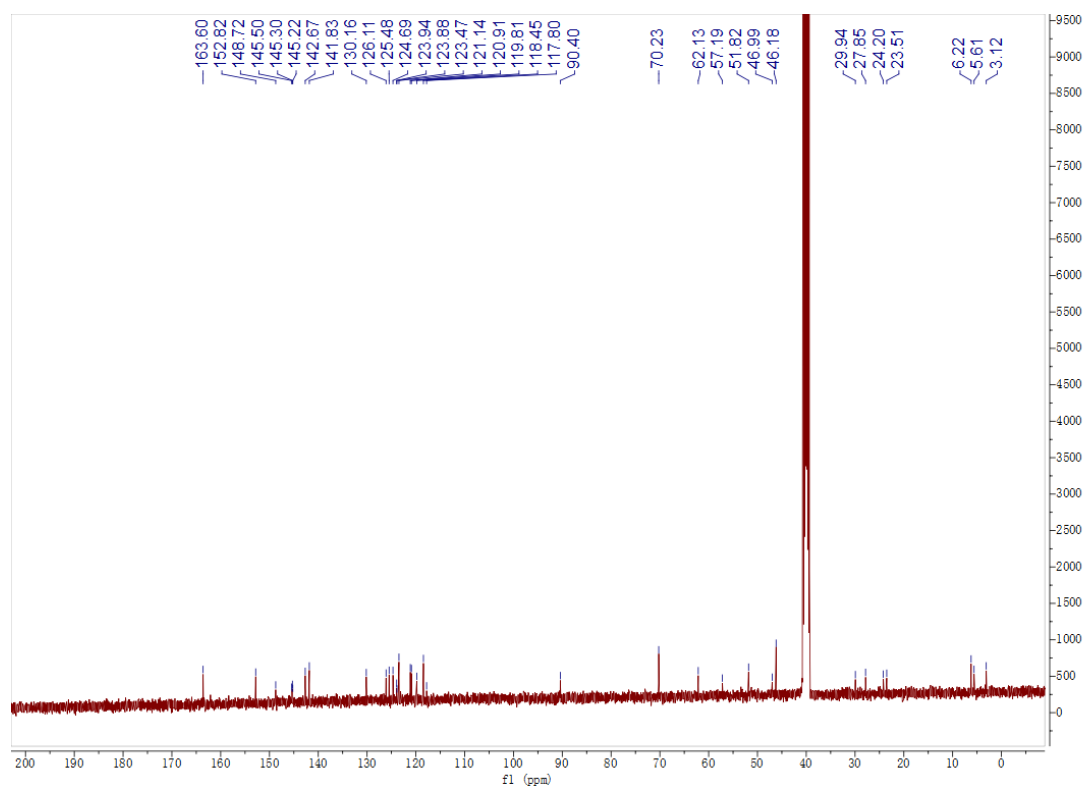

Figure S40. <sup>13</sup>C NMR (100M HZ, DMSO-*d*<sub>6</sub>)

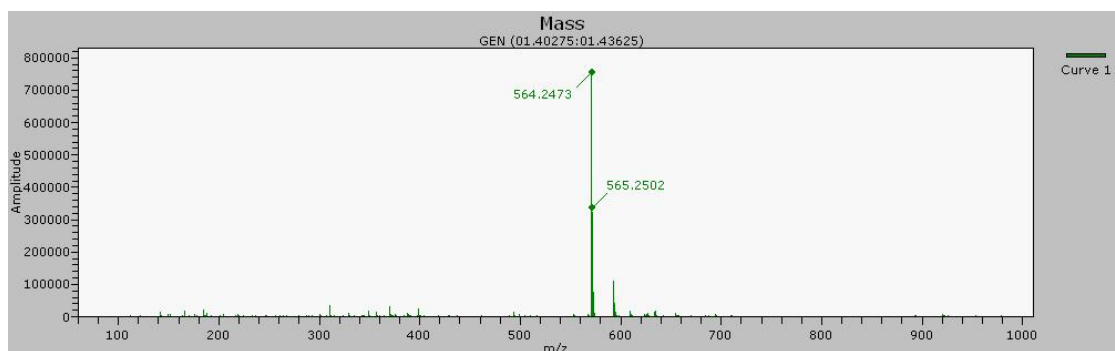

Figure S41. HRMS

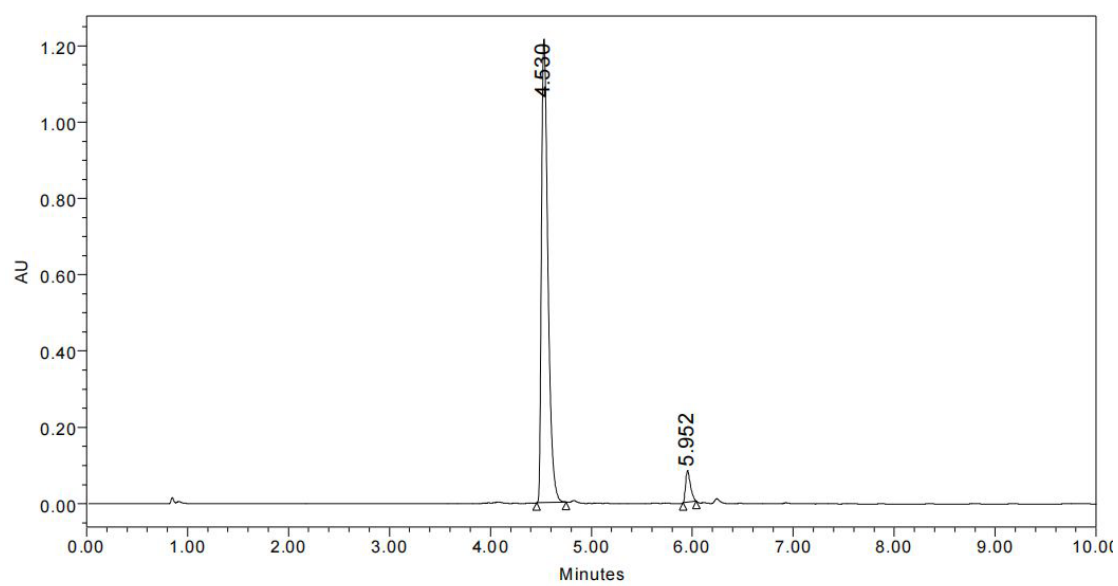

|   | RT    | Area    | % Area | Height  |
|---|-------|---------|--------|---------|
| 1 | 4.530 | 5378630 | 95.15  | 1214480 |
| 2 | 5.952 | 274253  | 4.85   | 82062   |

Figure S42. HPLC
